# Supplementary material for: Phenotype, disease severity and pain are major determinants of quality of life in Fabry disease: results from a large multicenter cohort study
Source: PubMed Central journal article supplement (PMC5786653; doi:10.1007/s10545-017-0095-6), 2017-10-16
Supplement: 10545_2017_95_MOESM2_ESM.pdf [file 10545_2017_95_MOESM2_ESM.pdf]

**Supplemental table B** Health profile of first EQ-5D measurement per disease state

| Disease state             | No organ involvement     | Neuropathic pain | Organ involvement | End stage renal disease | Cerebrovascular accident | Cardiac complication(s) | Multiple complications |
|---------------------------|--------------------------|------------------|-------------------|-------------------------|--------------------------|-------------------------|------------------------|
| Patients <sup>#</sup> , n | 31                       | 21               | 221               | 7                       | 16                       | 45                      | 18                     |
| Mobility                  | (Number of patients (%)) |                  |                   |                         |                          |                         |                        |
| 1*                        | 28 (90.3)                | 17 (81)          | 169 (76.5)        | 4 (57.1)                | 9 (56.2)                 | 24 (53.3)               | 5 (27.8)               |
| 2                         | 3 (9.7)                  | 4 (19)           | 52 (23.5)         | 3 (42.9)                | 7 (43.8)                 | 21 (46.7)               | 12 (66.7)              |
| 3                         | 0 (0.0)                  | 0 (0.0)          | 0 (0.0)           | 0 (0.0)                 | 0 (0.0)                  | 0 (0.0)                 | 1 (5.6)                |
| Self-care                 | (Number of patients (%)) |                  |                   |                         |                          |                         |                        |
| 1                         | 30 (96.8)                | 20 (95.2)        | 209 (94.6)        | 5 (71.4)                | 13 (81.2)                | 40 (88.9)               | 12 (66.7)              |
| 2                         | 1 (3.2)                  | 1 (4.8)          | 10 (4.5)          | 2 (28.6)                | 3 (18.8)                 | 5 (11.1)                | 5 (27.8)               |
| 3                         | 0 (0.0)                  | 0 (0.0)          | 2 (0.9)           | 0 (0.0)                 | 0 (0.0)                  | 0 (0.0)                 | 1 (5.6)                |
| Usual activities          | (Number of patients (%)) |                  |                   |                         |                          |                         |                        |
| 1                         | 25 (80.6)                | 11 (52.4)        | 143 (64.7)        | 4 (57.1)                | 7 (43.8)                 | 20 (44.4)               | 5 (27.8)               |
| 2                         | 5 (16.1)                 | 10 (47.6)        | 69 (31.2)         | 3 (42.9)                | 9 (56.2)                 | 24 (53.3)               | 11 (61.1)              |
| 3                         | 1 (3.2)                  | 0 (0.0)          | 9 (4.1)           | 0 (0.0)                 | 0 (0.0)                  | 1 (2.2)                 | 2 (11.1)               |
| Pain/discomfort           | (Number of patients (%)) |                  |                   |                         |                          |                         |                        |
| 1                         | 20 (64.5)                | 8 (38.1)         | 108 (48.9)        | 5 (71.4)                | 5 (31.2)                 | 19 (42.2)               | 2 (11.1)               |
| 2                         | 9 (29.0)                 | 8 (38.1)         | 96 (43.3)         | 2 (28.6)                | 10 (62.5)                | 22 (48.9)               | 15 (83.3)              |
| 3                         | 2 (6.5)                  | 5 (23.8)         | 17 (7.7)          | 0 (0.0)                 | 1 (6.2)                  | 4 (8.9)                 | 1 (5.6)                |
| Anxiety/Depression        | (Number of patients (%)) |                  |                   |                         |                          |                         |                        |
| 1                         | 20 (64.5)                | 13 (61.9)        | 149 (67.4)        | 5 (71.4)                | 12 (75.0)                | 27 (60.0)               | 11 (61.1)              |
| 2                         | 10 (32.2)                | 8 (38.1)         | 69 (31.2)         | 2 (28.6)                | 4 (25.0)                 | 15 (33.3)               | 6 (33.3)               |
| 3                         | 1 (3.2)                  | 0 (0.0)          | 3 (1.4)           | 0 (0.0)                 | 0 (0.0)                  | 3 (6.7)                 | 1 (5.6)                |

<sup>#</sup> Patients may have more than one EQ-5D per disease state and may contribute to more than one disease state

\* 1 = No problems, 2 = Some/Moderate problems, 3 = Extreme problems
