# Supplementary material for: Phenotype, disease severity and pain are major determinants of quality of life in Fabry disease: results from a large multicenter cohort study
Source: PubMed Central journal article supplement (PMC5786653; doi:10.1007/s10545-017-0095-6), 2017-10-16
Supplement: 10545_2017_95_MOESM3_ESM.pdf [file 10545_2017_95_MOESM3_ESM.pdf]

**Supplemental table C** Comparison of health profile first EQ-5D of present study with literature

|                            | Present study            | Present study                   | Miners et al (2002) | Kind et al (1998)         | Lamers et al (2006)       |
|----------------------------|--------------------------|---------------------------------|---------------------|---------------------------|---------------------------|
|                            | FD (all patients)        | FD (men with classical disease) | FD (pre-ERT cohort) | Sample general population | Sample general population |
| N                          | 286                      | 76                              | 38                  | 3395                      | 298                       |
| Age, years ( $\pm$ SD)     | 42.5 ( $\pm$ 15.5)       | 37.4 ( $\pm$ 12.5)              | 37.2 ( $\pm$ 9.2)   | Unknown                   | 43.4 ( $\pm$ 15.0)        |
| Men, n (%)                 | 114 (39.8)               | 76 (100)                        | 38 (100)            | 1562 (46)                 | 152 (51.0)                |
| Classical phenotype, n (%) | 172 (60.1)               | 76 (100)                        | Unknown             | -                         | -                         |
| Country                    | UK/NL                    | UK/NL                           | UK                  | UK                        | NL                        |
| Mobility                   | (Number of patients (%)) |                                 |                     |                           |                           |
| 1*                         | 207 (72.4)               | 48 (63.2)                       | 19 (50.0)           | 2424 (71.6)               | 258 (86.5)                |
| 2                          | 78 (27.3)                | 27 (35.5)                       | 18 (47.4)           | 620 (18.3)                | 40 (13.5) <sup>#</sup>    |
| 3                          | 1 (0.3)                  | 1 (1.3)                         | 1 (2.6)             | 3 (0.1)                   |                           |
| Self-care                  | (Number of patients (%)) |                                 |                     |                           |                           |
| 1                          | 261 (91.3)               | 64 (84.2)                       | 28 (73.7)           | 3285 (95.8)               | 292 (98.0)                |
| 2                          | 22 (7.7)                 | 10 (13.2)                       | 9 (23.7)            | 139 (4.1)                 | 6 (2.0) <sup>#</sup>      |
| 3                          | 3 (1.0)                  | 2 (2.6)                         | 1 (2.6)             | 5 (0.1)                   |                           |
| Usual activities           | (Number of patients (%)) |                                 |                     |                           |                           |
| 1                          | 173 (60.5)               | 40 (52.6)                       | 17 (44.7)           | 2829 (83.7)               | 257 (86.2)                |
| 2                          | 101 (35.3)               | 32 (42.1)                       | 20 (52.7)           | 481 (14.2)                | 41 (13.8) <sup>#</sup>    |
| 3                          | 12 (4.2)                 | 4 (5.3)                         | 1 (2.6)             | 70 (2.1)                  |                           |
| Pain/discomfort            | (Number of patients (%)) |                                 |                     |                           |                           |
| 1                          | 138 (48.3)               | 29 (38.2)                       | 10 (26.3)           | 2268 (67.0)               | 193 (64.8)                |
| 2                          | 127 (44.4)               | 43 (56.6)                       | 21 (55.3)           | 988 (29.2)                | 105 (35.2) <sup>#</sup>   |
| 3                          | 21 (7.3)                 | 4 (5.3)                         | 7 (18.4)            | 129 (3.8)                 |                           |
| Anxiety/depression         | (Number of patients (%)) |                                 |                     |                           |                           |
| 1                          | 191 (66.8)               | 51 (67.1)                       | 19 (50.0)           | 2687 (79.1)               | 255 (85.6)                |
| 2                          | 90 (31.5)                | 25 (32.9)                       | 14 (36.8)           | 648 (19.1)                | 43 (14.4) <sup>#</sup>    |
| 3                          | 5 (1.7)                  | 0 (0.0)                         | 5 (13.2)            | 62 (1.8)                  |                           |

\* 1 = No problems, 2 = Some/Moderate problems, 3 = Extreme problems

N = Number of respondents, UK = United Kingdom, NL = Netherlands.

<sup>#</sup> Dutch sample of general population only provided combination of some/moderate and extreme problems as "any problems".
